# Supplementary material
Source: PubMed Central journal article supplement (PMC6790975)
Supplement: NIHMS1053857-supplement-Supplement.pdf [file NIHMS1053857-supplement-Supplement.pdf]

## **Supplemental material to “Structure and neural mechanisms of catatonia”**

Sebastian Walther, Katharina Stegmayer, Jo Ellen Wilson, Stephan Heckers

Content:

- Supplemental Table 1. Catatonia symptom distribution in Kahlbaum’s case series
- Supplemental Table 2. Prospective studies of catatonia treatment with blinded assessments: benzodiazepines, electroconvulsive therapy (ECT), and antipsychotics

| chapter           | case | page                    | Initials  | age         | sex | rm | Total symptoms per case | Symptom |                 |            |                                             |           |           |                  |            |          |                   |               |                    |            |                  |                       |                  |                          | affective (depressed/muric) | excitement/agitation | excitement/agitation in the presence of retarded catatonia |                     |           |                    |            |   |    |    |   |
|-------------------|------|-------------------------|-----------|-------------|-----|----|-------------------------|---------|-----------------|------------|---------------------------------------------|-----------|-----------|------------------|------------|----------|-------------------|---------------|--------------------|------------|------------------|-----------------------|------------------|--------------------------|-----------------------------|----------------------|------------------------------------------------------------|---------------------|-----------|--------------------|------------|---|----|----|---|
|                   |      |                         |           |             |     |    |                         | Mutism  | Stupor/Akinesia | Negativism | Aggression/Excitement/Agitation/Impulsivity | Posturing | Grimacing | Staring/Blinking | Withdrawal | Rigidity | Dyskinesia/Tremor | Verbalization | Muscular Hypotonia | Mannerisms | Waxy Flexibility | Autonomic Abnormality | Motor Inhibition | Stereotypy/Perseveration |                             |                      |                                                            | Automatic Obedience | Catatapsy | Speech Abnormality | Iterations |   |    |    |   |
| 1                 | 1    | case history            | 9-14      | BL          | 27  | m  | 12                      | x       | x               | x          | x                                           | x         | x         | x                | x          | x        | x                 | x             | x                  | x          | x                | x                     | x                | x                        | x                           | x                    | x                                                          | x                   | d         | x                  | ? Page 10  |   |    |    |   |
| 1                 | 2    | case history            | 14-17     | JG          | 33  | m  | yes                     | 12      | x               | x          | x                                           | x         | x         | x                | x          | x        | x                 | x             | x                  | x          | x                | x                     | x                | x                        | x                           | x                    | x                                                          | x                   | d         | x                  | x          |   |    |    |   |
| 1                 | 3    | case history            | 17-20     | MvB         | 45  | f  | 6                       | x       | x               | x          | x                                           | x         | x         | x                | x          | x        | x                 | x             | x                  | x          | x                | x                     | x                | x                        | x                           | x                    | x                                                          | d/m                 | x         | x                  |            |   |    |    |   |
| 1                 | 4    | summary                 | 20-21     | AM          | 29  | f  | 7                       | x       | x               | x          | x                                           | x         | x         | x                | x          | x        | x                 | x             | x                  | x          | x                | x                     | x                | x                        | x                           | x                    | x                                                          | m                   | x         | x                  |            |   |    |    |   |
| 1                 | 5    | summary                 | 21-22     | MG          | 20  | m  | 5                       | x       | x               | x          | x                                           | x         | x         | x                | x          | x        | x                 | x             | x                  | x          | x                | x                     | x                | x                        | x                           | x                    | x                                                          | m                   |           |                    |            |   |    |    |   |
| 1                 | 6    | summary                 | 22-23     | AL          | 24  | m  | 7                       | x       | x               | x          | x                                           | x         | x         | x                | x          | x        | x                 | x             | x                  | x          | x                | x                     | x                | x                        | x                           | x                    | x                                                          | d                   |           |                    |            |   |    |    |   |
| 1                 | 7    | summary                 | 23-25     | PU          | 33  | m  | 8                       | x       | x               | x          | x                                           | x         | x         | x                | x          | x        | x                 | x             | x                  | x          | x                | x                     | x                | x                        | x                           | x                    | x                                                          | d                   |           |                    |            |   |    |    |   |
| 1                 | 8    | summary                 | 25        | NvJ         | 24  | f  | 5                       | x       | x               | x          | x                                           | x         | x         | x                | x          | x        | x                 | x             | x                  | x          | x                | x                     | x                | x                        | x                           | x                    | x                                                          | d/m                 |           |                    |            |   |    |    |   |
| 1                 | 9    | summary                 | 25-26     | WR          | 21  | f  | 4                       | x       | x               | x          | x                                           | x         | x         | x                | x          | x        | x                 | x             | x                  | x          | x                | x                     | x                | x                        | x                           | x                    | x                                                          | d                   |           |                    |            |   |    |    |   |
| 2                 | 10   | summary                 | 31-32     | report only | 25  | m  | 3                       | x       | x               | x          | x                                           | x         | x         | x                | x          | x        | x                 | x             | x                  | x          | x                | x                     | x                | x                        | x                           | x                    | x                                                          | d                   |           |                    |            |   |    |    |   |
| 2                 | 11   | case history            | 34-37     | PM          | 24  | m  | 9                       | x       | x               | x          | x                                           | x         | x         | x                | x          | x        | x                 | x             | x                  | x          | x                | x                     | x                | x                        | x                           | x                    | x                                                          | d/m                 | x         | x                  |            |   |    |    |   |
| 2                 | 12   | case history            | 38-39     | JT          | ?   | m  | 7                       | x       | x               | x          | x                                           | x         | x         | x                | x          | x        | x                 | x             | x                  | x          | x                | x                     | x                | x                        | x                           | x                    | x                                                          | d/m                 | x         | x                  |            |   |    |    |   |
| 2                 | 13   | case history            | 40-42     | MA          | ?   | m  | 5                       | x       | x               | x          | x                                           | x         | x         | x                | x          | x        | x                 | x             | x                  | x          | x                | x                     | x                | x                        | x                           | x                    | x                                                          | m                   | x         | x                  |            |   |    |    |   |
| 2                 | 14   | case history            | 42-45     | BVT         | 22  | m  | 11                      | x       | x               | x          | x                                           | x         | x         | x                | x          | x        | x                 | x             | x                  | x          | x                | x                     | x                | x                        | x                           | x                    | x                                                          | d/m                 | x         | x                  |            |   |    |    |   |
| 15 ??             |      |                         |           |             |     |    |                         |         |                 |            |                                             |           |           |                  |            |          |                   |               |                    |            |                  |                       |                  |                          |                             |                      |                                                            |                     |           |                    |            |   |    |    |   |
| 4                 | 16   | case history            | 60-61     | AG          | 44  | f  | yes                     | 6       | x               | x          | x                                           | x         | x         | x                | x          | x        | x                 | x             | x                  | x          | x                | x                     | x                | x                        | x                           | x                    | x                                                          | x                   |           |                    |            |   |    |    |   |
| 4                 | 17   | case history            | 62-65(66) | JP          | 33  | m  | yes                     | 9       | x               | x          | x                                           | x         | x         | x                | x          | x        | x                 | x             | x                  | x          | x                | x                     | x                | x                        | x                           | x                    | x                                                          | x                   |           |                    |            |   |    |    |   |
| 4                 | 18   | case history            | 67(-68)   | FS          | 26  | m  | yes                     | 6       | x               | x          | x                                           | x         | x         | x                | x          | x        | x                 | x             | x                  | x          | x                | x                     | x                | x                        | x                           | x                    | x                                                          | m                   |           |                    |            |   |    |    |   |
| 4                 | 19   | survey                  | 68-69     | WH          | 26  | f  | yes                     | 5       | x               | x          | x                                           | x         | x         | x                | x          | x        | x                 | x             | x                  | x          | x                | x                     | x                | x                        | x                           | x                    | x                                                          | d/m                 |           |                    |            |   |    |    |   |
| 4                 | 20   | survey                  | 69-70(71) | GI          | 40  | m  | yes                     | 6       | x               | x          | x                                           | x         | x         | x                | x          | x        | x                 | x             | x                  | x          | x                | x                     | x                | x                        | x                           | x                    | x                                                          | m                   | x         | ? Page 70          |            |   |    |    |   |
| 4                 | 21   | few data                | 71-72     | ?           | ?   | ?  | yes                     |         |                 |            |                                             |           |           |                  |            |          |                   |               |                    |            |                  |                       |                  |                          |                             |                      |                                                            |                     |           |                    |            |   |    |    |   |
| 4                 | 22   | case history (few data) | 74(-75)   | FS          | 42  | m  | yes                     |         |                 |            |                                             |           |           |                  |            |          |                   |               |                    |            |                  |                       |                  |                          |                             |                      |                                                            |                     |           |                    |            |   |    |    |   |
| 4                 | 23   | case history (few data) | 75(-76)   | RS          | 44  | m  | yes                     |         |                 |            |                                             |           |           |                  |            |          |                   |               |                    |            |                  |                       |                  |                          |                             |                      |                                                            |                     |           |                    |            |   |    |    |   |
| 4                 | 24   | case history (few data) | 76(-77)   | JN          | 31  | m  | yes                     |         |                 |            |                                             |           |           |                  |            |          |                   |               |                    |            |                  |                       |                  |                          |                             |                      |                                                            |                     |           |                    |            |   |    |    |   |
| 4                 | 25   | case history (few data) | 77        | JvO         | 35  | m  | yes                     |         |                 |            |                                             |           |           |                  |            |          |                   |               |                    |            |                  |                       |                  |                          |                             |                      |                                                            |                     |           |                    |            |   |    |    |   |
| 6                 | 26   | case history            | 87-89     | SX          | 43  | m  | 10                      | x       | x               | x          | x                                           | x         | x         | x                | x          | x        | x                 | x             | x                  | x          | x                | x                     | x                | x                        | x                           | x                    | x                                                          | d/m                 | x         | x                  |            |   |    |    |   |
| Symptom Frequency |      |                         |           |             |     |    |                         | 19      | 16              | 12         | 12                                          | 11        | 8         | 8                | 8          | 8        | 8                 | 7             | 4                  | 4          | 4                | 4                     | 4                | 2                        | 2                           | 2                    | 2                                                          | 2                   | 2         | 2                  | 2          | 1 | 16 | 12 | 9 |

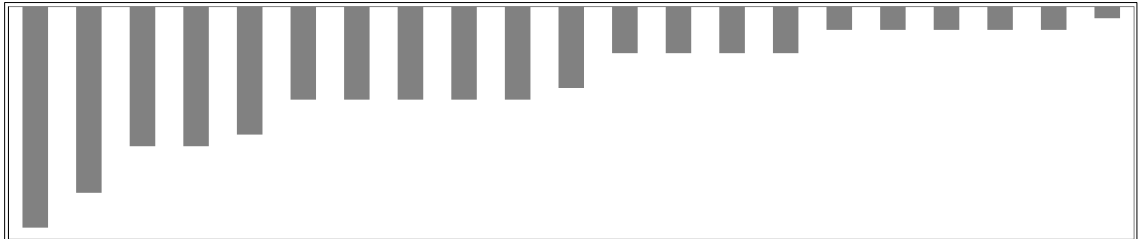

**Supplemental Table 2. Prospective studies of catatonia treatment with blinded assessments: benzodiazepines, electroconvulsive therapy (ECT), and antipsychotics**

| Treatment                              | Author                              | Study type               | n  | Diagnosis sample                                                   | State                    | Treatment effect                         |
|----------------------------------------|-------------------------------------|--------------------------|----|--------------------------------------------------------------------|--------------------------|------------------------------------------|
| Lorazepam 4-8mg/d                      | Bush et al. <sup>1</sup>            | Prospective cohort       | 21 | DSM-III-R and BFCRS<br>AFF, SYS, PSY, DRU                          | MIX                      | Remission 76%                            |
| Lorazepam 3mg/d, Diazepam up to 16mg/d | Hatta et al. <sup>2</sup>           | Prospective cohort       | 41 | DSM-IV<br>PSY, AFF, SYS                                            | MIX                      | Remission 2%                             |
| Lorazepam 2mg, Diazepam 10mg /8h       | Hung and Huang <sup>3</sup>         | Prospective cohort       | 7  | DSM-IV<br>AFF                                                      | Unclear                  | Remission 100%                           |
| Lorazepam 2mg once                     | Kritzinger and Jordaan <sup>4</sup> | Open prospective         | 9  | DSM-IV<br>PSY, AFF, OTH                                            | Unclear                  | Remission 66%                            |
| Lorazepam, Clonazepam 4-8mg /d         | Lee et al. <sup>5</sup>             | Prospective cohort       | 22 | DSM-III-R and IV, ICD-10<br>BFCRS, MRS<br>PSY, AFF, OTH            | MIX                      | Remission 73%<br>partial remission 27%   |
| Lorazepam 2mg, Diazepam 1.25 mg/h      | Lin et al. <sup>6</sup>             | Prospective cohort       | 21 | DSM-IV,<br>BFCRS<br>SCZ                                            | MIX (18 ACT, 3 CHR)      | Remission 100%                           |
| Lorazepam 2-10mg/d                     | Northoff et al. <sup>7</sup>        | Prospective cohort       | 18 | DSM-III-R, Lohr and Wisniewski, Rosebush<br>PSY, AFF, OTH          | ACT (neuroleptica naïve) | Response 66%                             |
| Lorazepam 1-2mg/d                      | Rosebush et al. <sup>8</sup>        | Prospective open label   | 15 | DSM-III-R<br>AFF, PSY, OTH                                         | MIX                      | Remission 80%,<br>partial remission 6.6% |
| Lorazepam 1mg/10min                    | Seethalakshmi et al. <sup>9</sup>   | Prospective cohort       | 16 | DSM-IV,<br>BFCRS<br>PSY, AFF, OTH, DRU                             | MIX                      | Remission 75%,<br>partial remission 18%  |
| Lorazepam 2mg/d, Diazepam 10mg/d       | Ungvari et al. <sup>10</sup>        | Prospective open label   | 18 | DSM-III-R, Lohr and Wisniewski, Rosebush, McCall scale<br>PSY, AFF | ACT                      | Improvement 89%                          |
| Lorazepam 6mg/d                        | Ungvari et al. <sup>11</sup>        | RCT                      | 20 | DSM-IV,<br>BFCRS<br>SCZ                                            | CHR                      | Improvement 0%                           |
| Lorazepam 2-3mg/d                      | Yassa et al. <sup>12</sup>          | Prospective open label   | 10 | Not reported<br>AFF, PSY, unknown                                  | ACT                      | Remission 100%                           |
| ECT bilateral                          | Bush et al. <sup>1</sup>            | Prospective cohort       | 4  | DSM-III-R and BFCRS<br>AFF, OTH                                    | MIX                      | Remission 100%                           |
| ECT bilateral                          | Escobar et al. <sup>13</sup>        | Prospective open label   | 9  | DSM-IV, MRS<br>Affective and schizophrenia                         | Unclear                  | Response 70%                             |
| ECT bitemporal                         | Flamarique et al. <sup>14</sup>     | Case series within a RCT | 4  | CGI<br>Schizophrenia (child and adolescents)                       | ACT (first occurrence)   | Response 68%                             |
| ECT bilateral vs Risperidone           | Girish and Gill <sup>15</sup>       | RCT                      | 14 | ICD-10, BFCRS<br>SCZ, PSY                                          | MIX                      | ECT > risperidone<br>Reduction of        |

|                                                                     |                               |                               |    |                            |         |                                                                |
|---------------------------------------------------------------------|-------------------------------|-------------------------------|----|----------------------------|---------|----------------------------------------------------------------|
|                                                                     |                               |                               |    |                            |         | catatonia symptoms                                             |
| ECT bilateral                                                       | Hatta et al. <sup>2</sup>     | Prospective cohort            | 17 | DSM-IV unknown             | MIX     | Remission 100%                                                 |
| ECT bitemporal                                                      | Medda et al. <sup>16</sup>    | Open prospective              | 13 | DSM-IV, BFCRS, CGI Bipolar | MIX     | Response 80.8%                                                 |
| ECT bifrontal or bitemporal                                         | Phutane et al. <sup>17</sup>  | RCT                           | 33 | BFCRS Schizophrenia        | MIX     | Response 88%                                                   |
| ECT continuation and neuroleptics                                   | Suzuki et al. <sup>18</sup>   | Prospective cohort            | 11 | DSM-IV, BPRS Schizophrenia | MIX     | Response 100%                                                  |
| Chlorpromazine (n = 28), Risperidone (n = 19), Haloperidol (n = 19) | Hatta et al. <sup>2</sup>     | Prospective cohort            | 66 | DSM-IV unknown             | Unclear | Remission Chlorpromazine 68%, Risperidone 25%, Haloperidol 16% |
| Olanzapine                                                          | Martenyi et al. <sup>19</sup> | Open-label double-blind trial | 35 | DSM-IV, PANSS SCZ          | MIX     | PANSS after 1 week -13.1 points                                |

Abbreviations: n = number of subjects at final follow up, DSM = Diagnostic and Statistical Manual of Mental Disorders, ICD = International Classification of Disease, RCT = randomised controlled trial, BFCRS = Bush-Francis Catatonia Rating Scale, CGI = Clinical Global Impression for Improvement, PANSS = Positive and Negative Syndrome Scale, ECT = electroconvulsive therapy, Affective disorder = AFF, psychotic = PSY, schizophrenia = SCZ, systemic = SYS, drug induced = DRU, other = OTH, mixed = MIX, chronic = CHR, acute = ACT

## References

1. Bush G, Fink M, Petrides G, Dowling F, Francis A. Catatonia. II. Treatment with lorazepam and electroconvulsive therapy. *Acta Psychiatr Scand* 1996;93:137-143.
2. Hatta K, Miyakawa K, Ota T, Usui C, Nakamura H, Arai H. Maximal response to electroconvulsive therapy for the treatment of catatonic symptoms. *J ECT* 2007;23:233-235.
3. Hung YY, Huang TL. Lorazepam and diazepam rapidly relieve catatonic features in major depression. *Clin Neuropharmacol* 2006;29:144-147.
4. Kritzinger PR, Jordaan GP. Catatonia: an open prospective series with carbamazepine. *Int J Neuropsychopharmacol* 2001;4:251-257.
5. Lee JW, Schwartz DL, Hallmayer J. Catatonia in a psychiatric intensive care facility: incidence and response to benzodiazepines. *Ann Clin Psychiatry* 2000;12:89-96.
6. Lin CC, Huang TL. Lorazepam-diazepam protocol for catatonia in schizophrenia: a 21-case analysis. *Compr Psychiatry* 2013;54:1210-1214.
7. Northoff G, Wenke J, Demisch L, Eckert J, Gille B, Pflug B. Catatonia: short-term response to lorazepam and dopaminergic metabolism. *Psychopharmacology (Berl)* 1995;122:182-186.
8. Rosebush PI, Hildebrand AM, Furlong BG, Mazurek MF. Catatonic syndrome in a general psychiatric inpatient population: frequency, clinical presentation, and response to lorazepam. *J Clin Psychiatry* 1990;51:357-362.
9. Seethalakshmi R, Dhavale S, Suggu K, Dewan M. Catatonic syndrome: importance of detection and treatment with lorazepam. *Ann Clin Psychiatry* 2008;20:5-8.
10. Ungvari GS, Leung CM, Wong MK, Lau J. Benzodiazepines in the treatment of catatonic syndrome. *Acta Psychiatr Scand* 1994;89:285-288.
11. Ungvari GS, Chiu HF, Chow LY, Lau BS, Tang WK. Lorazepam for chronic catatonia: a randomized, double-blind, placebo-controlled cross-over study. *Psychopharmacology (Berl)* 1999;142:393-398.
12. Yassa R, Iskandar H, Lalinec M, Cleto L. Lorazepam as an adjunct in the treatment of catatonic states: an open clinical trial. *J Clin Psychopharmacol* 1990;10:66-68.
13. Escobar R, Rios A, Montoya ID, et al. Clinical and cerebral blood flow changes in catatonic patients treated with ECT. *J Psychosom Res* 2000;49:423-429.
14. Flamarique I, Baeza I, de la Serna E, Pons A, Bernardo M, Castro-Fornieles J. Long-term effectiveness of electroconvulsive therapy in adolescents with schizophrenia spectrum disorders. *Eur Child Adolesc Psychiatry* 2015;24:517-524.
15. Girish K, Gill NS. Electroconvulsive therapy in Lorazepam non-responsive catatonia. *Indian J Psychiatry* 2003;45:21-25.
16. Medda P, Toni C, Luchini F, Giorgi Mariani M, Mauri M, Perugi G. Catatonia in 26 patients with bipolar disorder: clinical features and response to electroconvulsive therapy. *Bipolar Disord* 2015;17:892-901.
17. Phutane VH, Thirthalli J, Muralidharan K, Naveen Kumar C, Keshav Kumar J, Gangadhar BN. Double-blind randomized controlled study showing symptomatic and cognitive superiority of bifrontal over bitemporal electrode placement during electroconvulsive therapy for schizophrenia. *Brain Stimul* 2013;6:210-217.
18. Suzuki K, Awata S, Matsuoka H. Short-term effect of ECT in middle-aged and elderly patients with intractable catatonic schizophrenia. *J ECT* 2003;19:73-80.
19. Martenyi F, Metcalfe S, Schausberger B, Dossenbach MR. An efficacy analysis of olanzapine treatment data in schizophrenia patients with catatonic signs and symptoms. *J Clin Psychiatry* 2001;62 Suppl 2:25-27.
